# Supplementary material for: Metabolic plasticity, essentiality and therapeutic potential of ribose-5-phosphate synthesis in Toxoplasma gondii
Source: PubMed Central journal article supplement (PMC11001932; doi:10.1038/s41467-024-47097-8), 2024-04-08
Supplement: 41467_2024_47097_MOESM1_ESM.pdf [file 41467_2024_47097_MOESM1_ESM.pdf]

## Supplementary Information for

### Metabolic plasticity, essentiality and therapeutic potential of ribose-5-phosphate synthesis in *Toxoplasma gondii*

Xuefang Guo<sup>1,2, #</sup>, Nuo Ji<sup>1,2, #</sup>, Qinghong Guo<sup>1,2</sup>, Mengting Wang<sup>1,2</sup>, Huiyu Du<sup>1,2</sup>,  
Jiajia Pan<sup>1,2</sup>, Lihua Xiao<sup>1,2</sup>, Nishith Gupta<sup>3,4, \*</sup>, Yaoyu Feng<sup>1,2, \*</sup>, Ningbo Xia<sup>1,2, \*</sup>

<sup>1</sup> State Key Laboratory for Animal Disease Control and Prevention, South China Agricultural University, Guangzhou, China

<sup>2</sup> Guangdong Laboratory for Lingnan Modern Agriculture, Center for Emerging and Zoonotic Diseases, College of Veterinary Medicine, South China Agricultural University, Guangzhou, Guangdong, China

<sup>3</sup> Intracellular Parasite Education and Research Labs (iPEARL), Department of Biological Sciences, Birla Institute of Technology and Science, Pilani (BITS-P), Hyderabad, India

<sup>4</sup> Department of Molecular Parasitology, Faculty of Life Sciences, Humboldt University, Berlin, Germany

# These authors contributed equally to this work.

\* Corresponding author: Nishith Gupta, Yaoyu Feng, Ningbo Xia

Email:

Gupta.Nishith@hyderabad.bits-pilani.ac.in;

yyfeng@scau.edu.cn;

ningboxia@scau.edu.cn

**Running title:** Ribose-5-phosphate Synthesis and Utilization in *Toxoplasma*

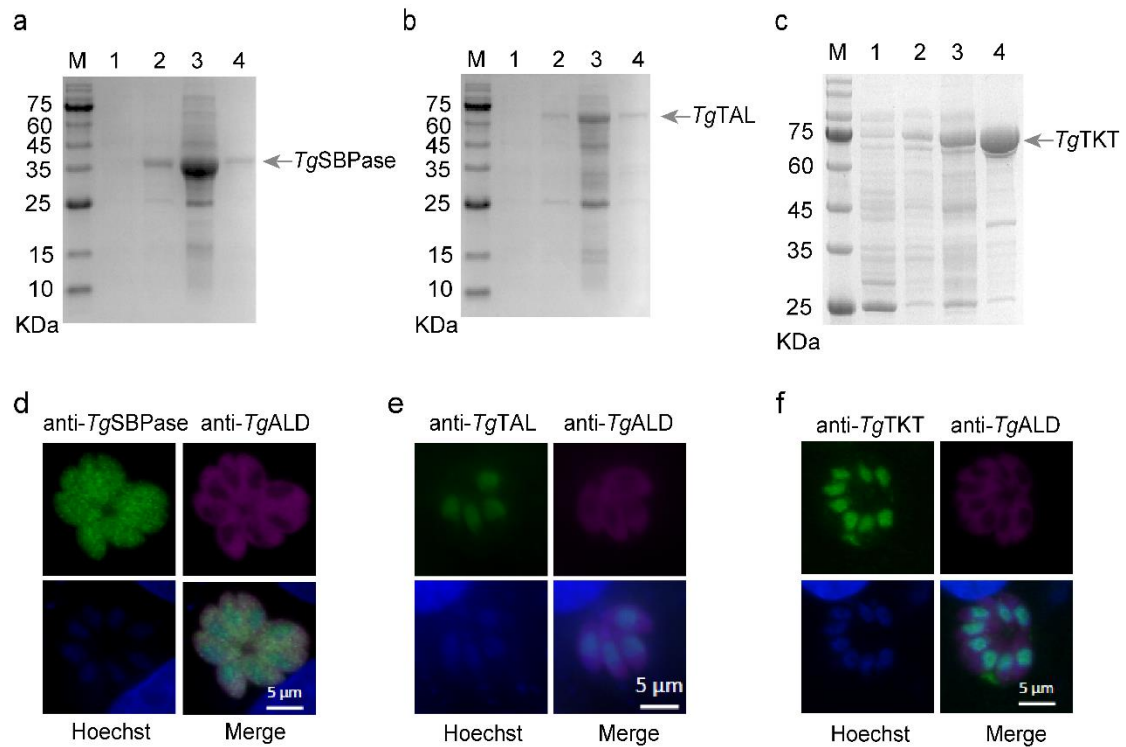

**Supplementary Fig. 1: Expression of recombinant SBPase, TAL and TKT in *E. coli* and localization in *T. gondii*.**

**a-c** SDS-PAGE analysis of indicated proteins. M: molecular weight markers; Lane 1: lysate from recombinant bacteria without IPTG induction; Lane 2: lysate from IPTG-induced bacteria; Lane 3: Supernatant of 6×His-protein; Lane 4: Inclusion body of 6xHis-protein. **d-e** Subcellular localization of the native SBPase, TAL and TKT proteins. ALD and Hoechst were used as the cytoplasmic and nucleus markers, respectively. Scale bars = 5 μm. Source data are provided as a Source data file.

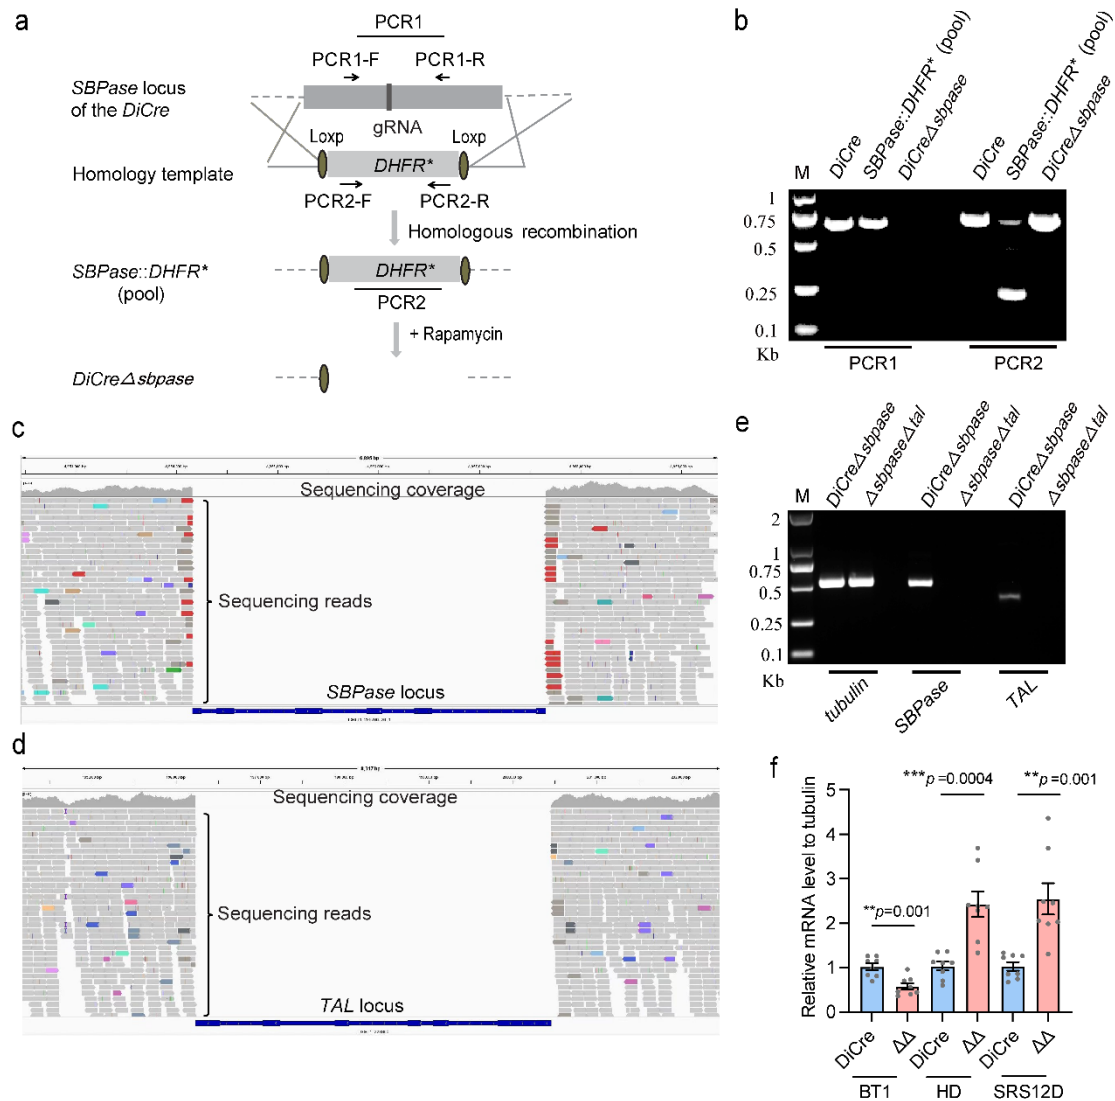

**Supplementary Fig. 2: Engineering of the *SBPase* mutant and characterization of the *SBPase-TAL* double deletion strain.**

**a** Schematics showing the construction of the *DiCreΔsbpase* strains. **b** Diagnostic PCRs confirming the *DiCreΔsbpase* mutant. **c-d** Sequencing of the *ΔsbpaseΔtal* double mutant. Genomic DNA was subjected to sequencing, and clean reads of the double mutant genome were aligned to the reference GT1 strain and visualized using Integrative Genomics Viewer 2.16.2. **e** Semi-quantitative RT-PCR confirming the absence of *SBPase* and *TAL* expression in the *ΔsbpaseΔtal* mutant ( $\beta$ -tubulin, control transcript). **f** Quantitative RT-PCR validation of the indicated transcripts.  $\beta$ -tubulin was used as an internal reference (eight replicates in total from two independent experiments, means  $\pm$  SEM; unpaired two-tailed Student's *t*-test). Source data are provided as a Source data file.

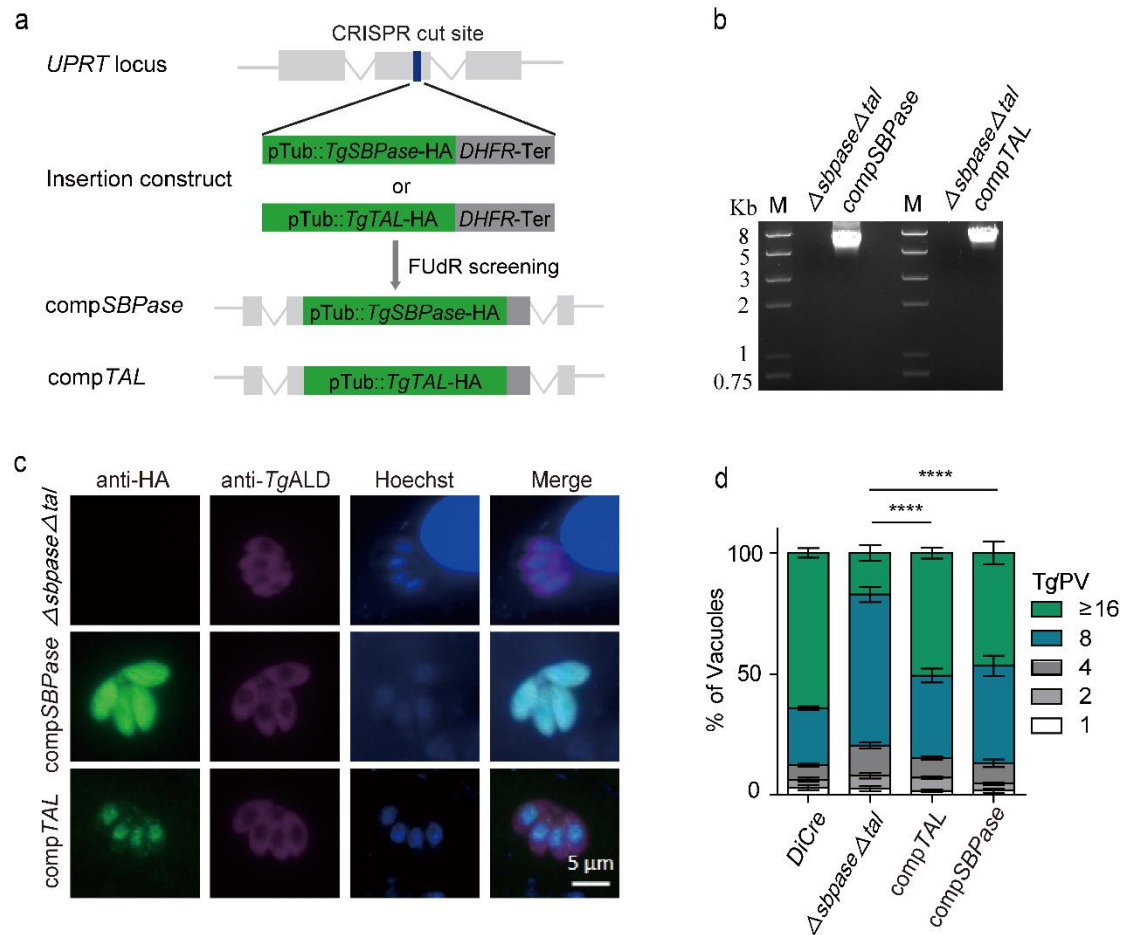

**Supplementary Fig. 3: Construction of the SBPase and TAL complementation strains.**

**a** Illustration for inserting the SBPase-HA or TAL-HA expression cassette at the *UPRT* locus of the  $\Delta sbpase \Delta tal$  mutant to generate the corresponding complementation strains (*compSBPase* and *compTAL*). **b** Genomic PCR to decipher the integration of SBPase or TAL-expressing cassette at the *UPRT* locus. **c** Expression of SBPase and TAL in the *compSBPase* and *compTAL* strains, respectively. The *compSBPase* and *compTAL* strains were stained with mouse anti-HA and rabbit anti-TgALD antibodies. Scale bars = 5  $\mu$ m. **d** Replication rates of the indicated strains. The data show means  $\pm$  SEM from four assays, each with two replicates (\*\*\*\*,  $p < 0.0001$ , two-way ANOVA). Source data are provided as a Source data file.

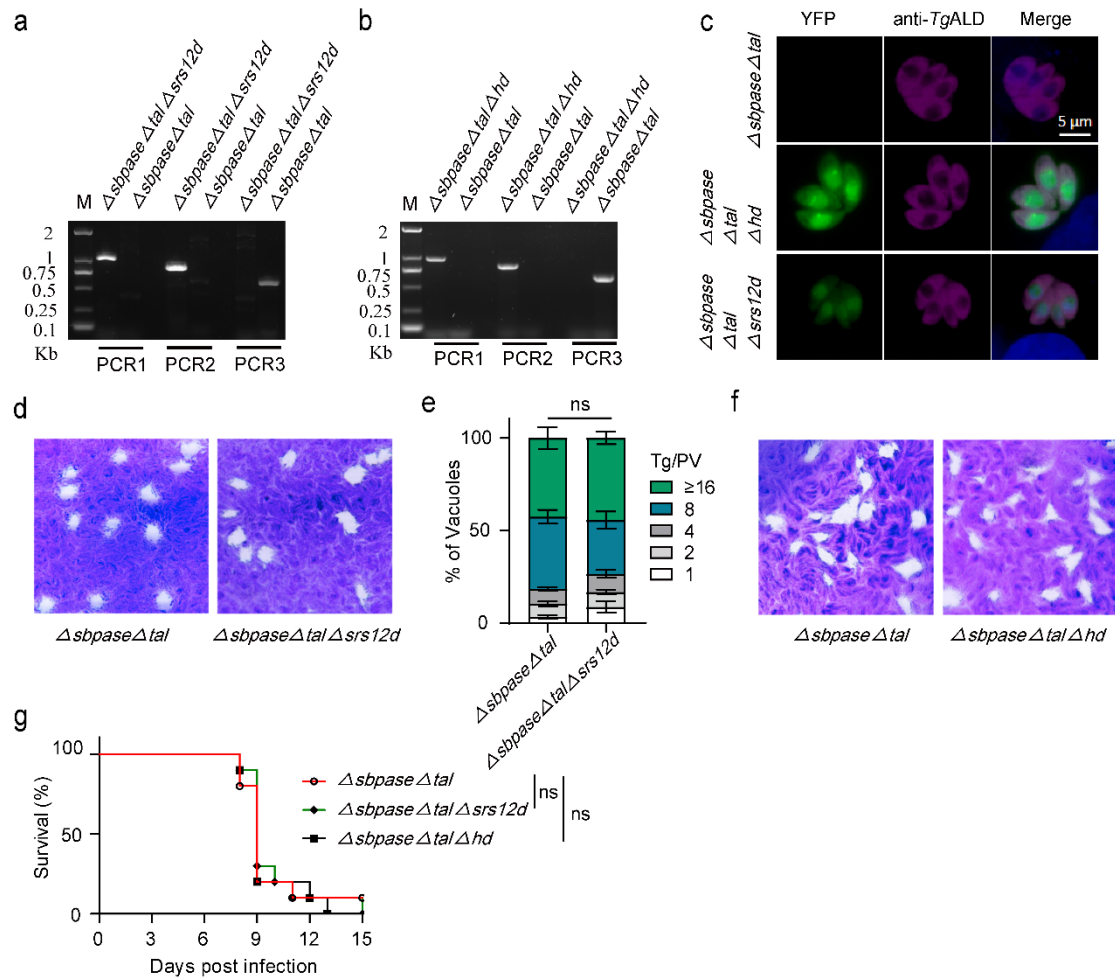

**Supplementary Fig. 4: Construction and characterization of the *ΔsbpaseΔtalΔsrs12d* and *ΔsbpaseΔtalΔhd* strains.**

**a-b** Diagnostic PCRs confirming the *ΔsbpaseΔtalΔsrs12d* and *ΔsbpaseΔtalΔhd* mutants. **c** Immunofluorescence staining revealing the disruption of *SRS12D* and *HD* through the insertion of a YFP-selectable marker. Scale bars = 5  $\mu$ m. **d** Plaque assay comparing the *ΔsbpaseΔtalΔsrs12d* and *ΔsbpaseΔtal* strains (7 days). **e** Replication rate of the *ΔsbpaseΔtalΔsrs12d* and *ΔsbpaseΔtal* mutants (n = 3 assays, means  $\pm$  SEM; ns, not significant,  $p = 0.1668$ , two-way ANOVA). **f** Plaque assay performed with the *ΔsbpaseΔtalΔhd* and *ΔsbpaseΔtal* strains. **g** Survival curves of mice infected by the *ΔsbpaseΔtal*, *ΔsbpaseΔtalΔsrs12d* or *ΔsbpaseΔtalΔhd* strains (10 mice/strain). Statistical significance tested by log rank Mantel-Cox test; ns, not significant,  $p = 0.9759$  (*ΔsbpaseΔtal* vs *ΔsbpaseΔtalΔsrs12d*),  $p = 0.9737$  (*ΔsbpaseΔtal* vs *ΔsbpaseΔtalΔhd*). Source data are provided as a Source data file.

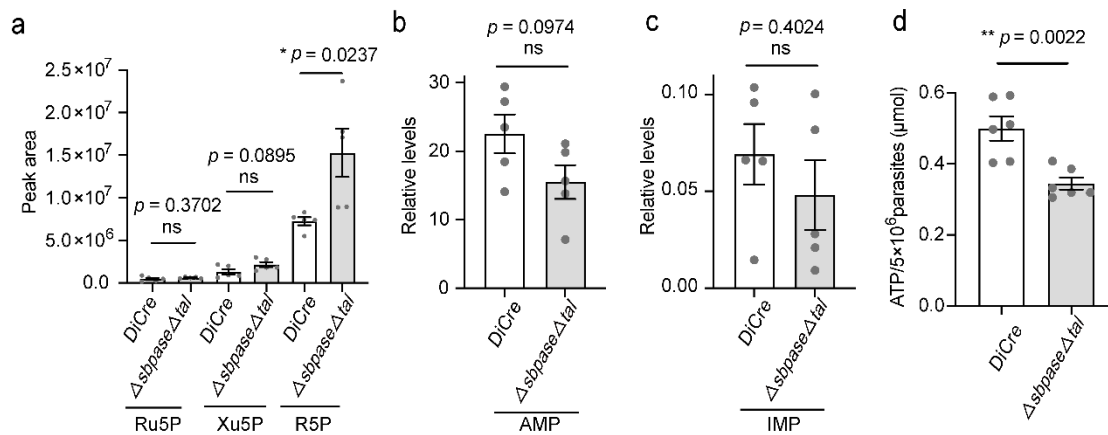

**Supplementary Fig. 5: Collective loss of *SBPase* and *TAL* is associated with reduced ATP content and accumulation of pentose sugars.**

**a** Quantification of Ru5P, Xu5P and R5P. Our metabolomic analysis shows cumulative unlabelled and labeled peaks (peak area  $\pm$  SEM, n = 5 experiments, ns, not significant, unpaired two-tailed Student's *t*-test). **b-c** Relative levels of AMP and IMP in intracellular *DiCre* and  $\Delta sbpase\Delta tal$  parasites. UHPLC-HRMS was used to analyze AMP and IMP (n = 5 experiments, means  $\pm$  SEM; ns, not significant, unpaired two-tailed Student's *t*-test). **d** The ATP levels in the parental (*DiCre*) and  $\Delta sbpase\Delta tal$  tachyzoites (means  $\pm$  SEM; n = 3 experiments, each with two replicates, unpaired two-tailed Student's *t*-test). Source data are provided as a Source data file.

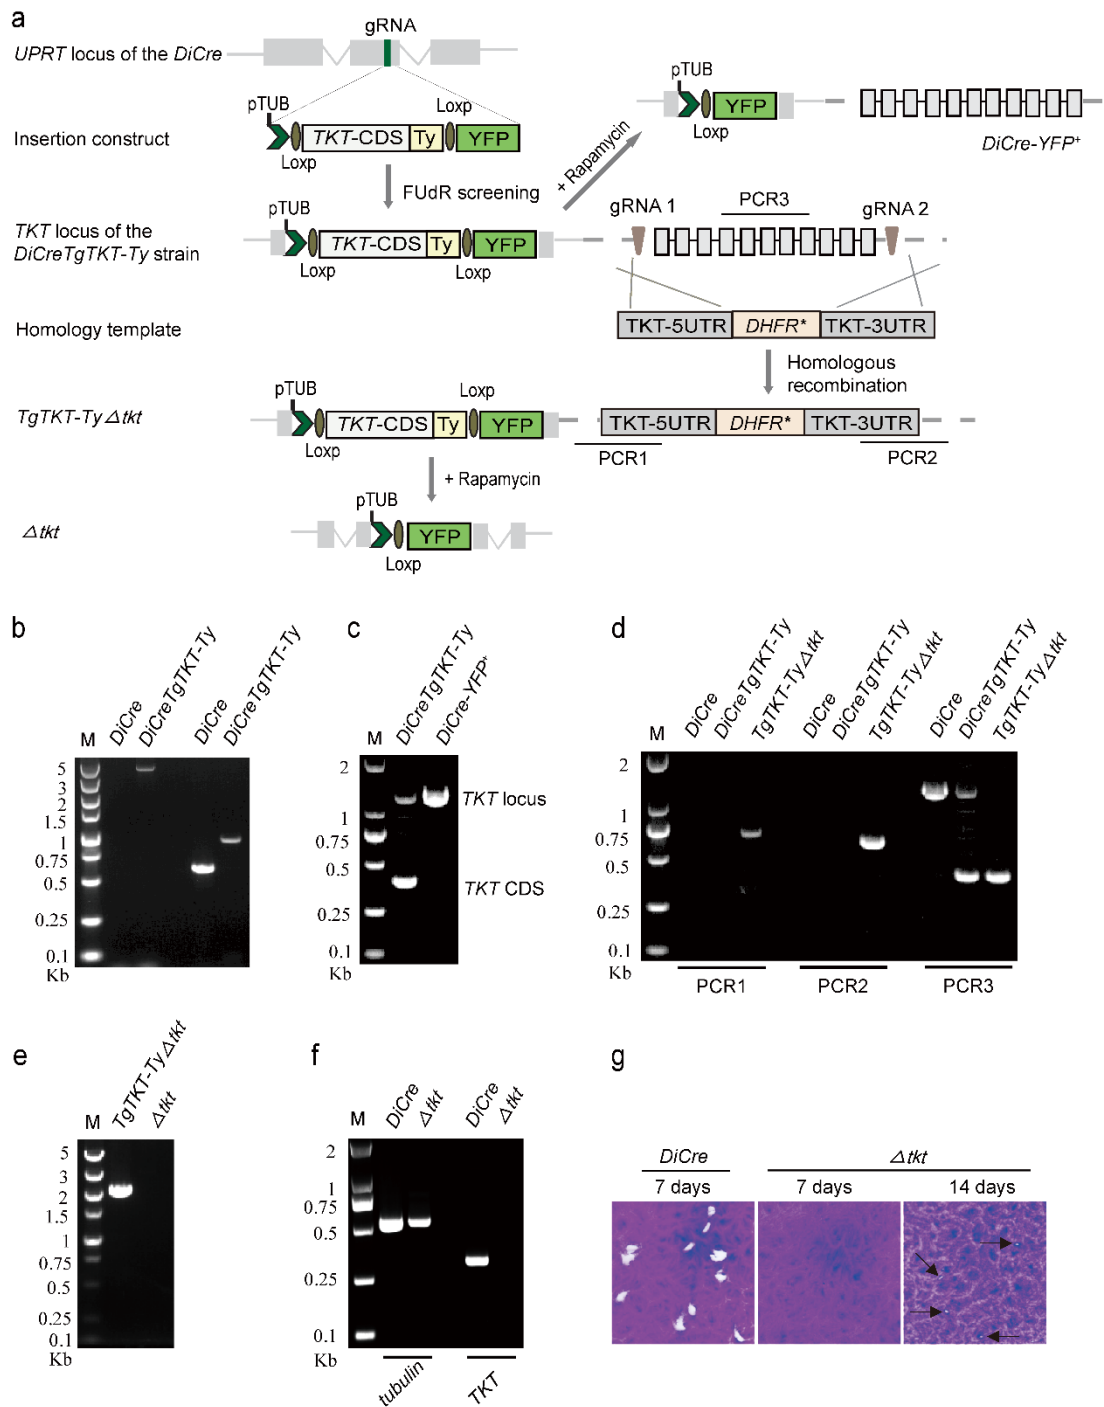

**Supplementary Fig. 6: Construction and phenotypic characterization of the TKT mutants.**

**a** Schematics of TKT mutants. Firstly, C-terminally Ty-tagged ORF of *TKT* was integrated at the *UPRT* locus by 5-fluorodeoxyuridine (FUDR) selection, and then the *TKT* locus was replaced by *DHFR-TS\** selection marker using CRISPR/Cas9-assisted gene replacement in the *DiCreTgTKT-Ty* strain. Subsequently, *DiCreTgTKT-Ty* and *TgTKT-TyΔtkt* strains were treated with rapamycin for 4 days and then YFP reporter strain (*DiCre-YFP+*) and *TKT*-knockout (*Δtkt*) clonal mutants were isolated by limited dilution in 96-well plates. **b-e** Diagnostic PCRs confirming the *DiCreTgTKT-Ty*,

*DiCre-YFP<sup>+</sup>*, *TgTKT-Ty $\Delta$ tkl* and  *$\Delta$ tkl* strains. **f** Semi-quantitative RT-PCR of the  *$\Delta$ tkl* mutant (tubulin, control). **g** Plaques formed by the  *$\Delta$ tkl* and *DiCre* (parental) strains cultured in standard medium for 7 or 14 days. Black arrows indicate minuscule plaques of the  *$\Delta$ tkl* mutant on day 14. Source data are provided as a Source data file.



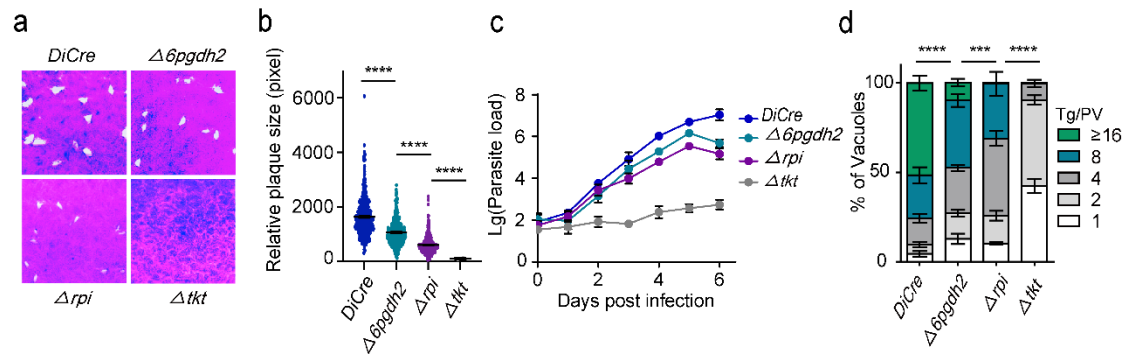

**Supplementary Fig. 7: Comparative growth of the  $\Delta 6pgdh2$ ,  $\Delta rpi$  and  $\Delta tkt$  mutants.**

**a-b** Plaque assay (n = 3 experiments, means  $\pm$  SEM; \*\*\*\*,  $p < 0.0001$ , unpaired two-tailed Student's *t*-test). **c** Growth curve analysis. n = 2 experiments, means  $\pm$  SEM. **d** Intracellular replication assay (24 h). The number of parasites in PV was quantified after immunostaining (n = 3 assays, means  $\pm$  SEM; \*\*\*,  $p = 0.0006$ , \*\*\*\*,  $p < 0.0001$ , two-way ANOVA). Source data are provided as a Source data file.

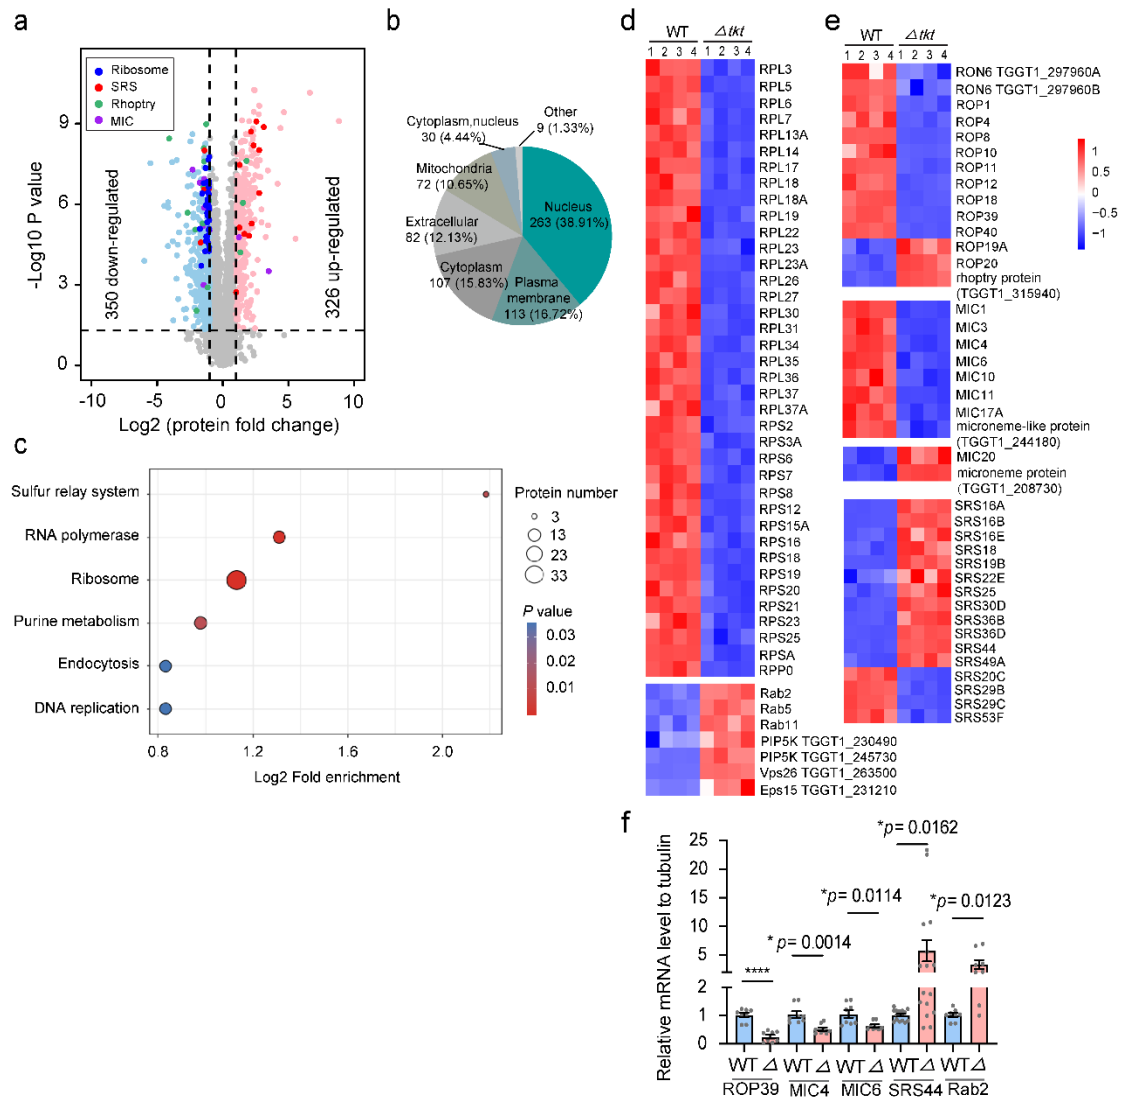

**Supplementary Fig. 8: *TKT* deletion alters the proteome of the mutant.**

**a** Proteomic profile of the  $\Delta tkt$  strain. Volcano plot illustrates ribosome, rhoptry, micronemal and stage-specific SRS Proteins in blue, green, purple and red color, respectively. **b** Pie chart revealing the subcellular localization of differentially expressed proteins. **c** KEGG analysis of proteins with  $\log_2$  fold changes  $\geq 2$  and  $p \leq 0.05$ . **d-e** Heatmap based on differential expression of ribosomal proteins, Rab and PIP5K proteins, microneme, rhoptry, and stage-specific proteins. **f** Quantitative RT-PCR validation of indicated transcripts.  $\beta$ -tubulin was used as an internal reference (means  $\pm$  SEM; \*\*\*\*,  $p < 0.0001$ , unpaired two-tailed Student's  $t$ -test). Source data are provided as a Source data file.

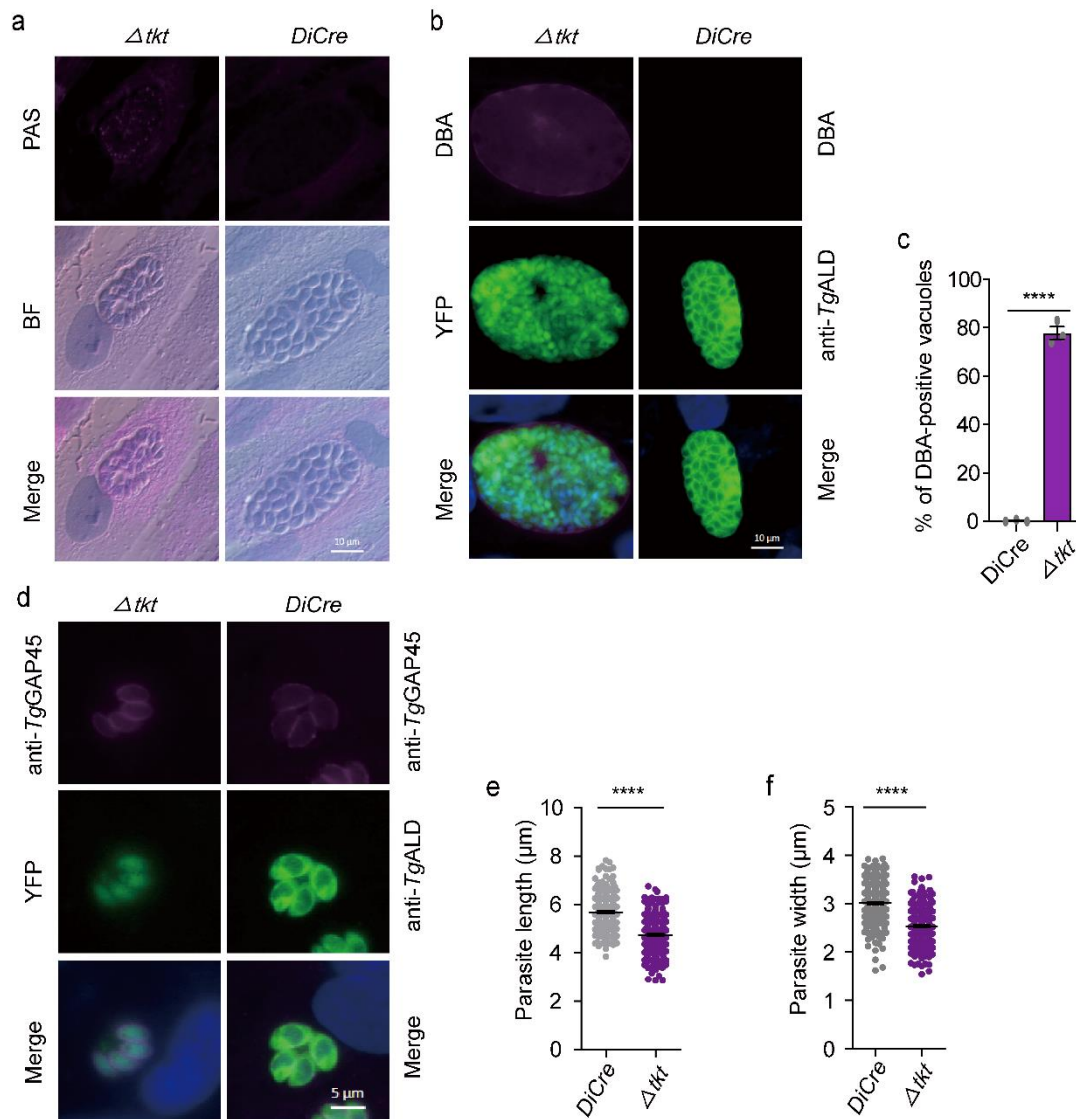

**Supplementary Fig. 9: TKT is essential for starch metabolism and bradyzoite differentiation.**

**a** Periodic Acid-Schiff (PAS) staining of the *DiCre* and  $\Delta tkt$  strains to visualize amylopectin granules (magenta). Scale bars = 10  $\mu$ m. **b** Cyst wall staining by Dolichos Biflorus Agglutinin (DBA, magenta). Anti-TgALD antibody (green) and YFP (green) were used to detect parasites. Scale bars = 10  $\mu$ m. **c** DBA-positive vacuoles containing 4 or more parasites. A minimum of 100 vacuoles were examined (n = 3 assays, means  $\pm$  SEM; \*\*\*\*,  $p < 0.0001$ , unpaired two-tailed Student's *t*-test). **d** The parental (*DiCre*) strain was stained with the mouse anti-TgGAP45 and rabbit anti-TgALD antibodies, whereas the  $\Delta tkt$  strain (YFP-positive) was labeled with the mouse anti-TgGAP45 antibody. Scale bars = 5  $\mu$ m. **e-f** Morphometric dimensions of the  $\Delta tkt$  and *DiCre* strains. Parasitophorous vacuoles harboring 4 parasites were analyzed for the length and width of parasites (means  $\pm$  SEM of > 200 parasites, \*\*\*\*,  $p < 0.0001$ , unpaired two-tailed Student's *t*-test). Source data are provided as a Source data file.

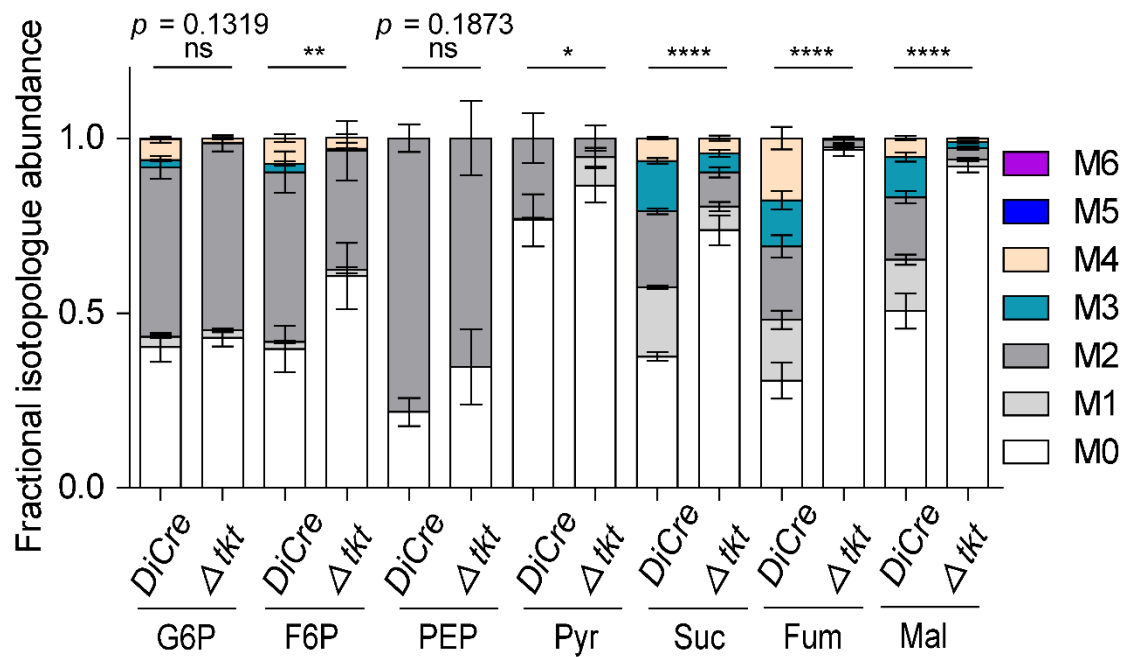

**Supplementary Fig. 10: Metabolic alterations in the TKT-null mutant.**

Extracellular parasites of the *DiCre* (parental) and  $\Delta tkk$  strains were incubated for 4 h in a medium with 8 mM 1,2- $^{13}\text{C}_2$ -glucose. The incorporation of  $^{13}\text{C}$  into glycolysis and TCA cycle intermediates was measured by UHPLC-HRMS. G6P: glucose-6-phosphate; F6P: fructose-6-phosphate; PEP: phosphoenolpyruvate; Pyr: pyruvate; Suc: succinate; Fum: fumarate; Mal: malate. M0-M6 represents the number of carbon atoms in selected  $^{13}\text{C}$ -labeled metabolites (n = 5 experiments, means  $\pm$  SEM; ns, not significant, \*,  $p = 0.0144$ , \*\*,  $p = 0.0099$ , \*\*\*\*,  $p < 0.0001$ , two-way ANOVA). Source data are provided as a Source data file.
